# Supplementary material for: Synthesis of Ni/Au/Co trimetallic nanoparticles and their catalytic activity for hydrogen generation from alkaline sodium borohydride aqueous solution
Source: Royal Society of Chemistry journal article supplement (doi:10.1039/c5ra01892g), 2015-01-01
Supplement: c5ra01892g1.pdf [file c5ra01892g1.pdf]

1 **Supporting Information**

2

3

4 **Synthesis of Ni/Au/Co Trimetallic Nanoparticles and Their Catalytic Activity for Hydrogen**

5 **Generation from Alkaline Sodium Borohydride Aqueous Solution**

6

7 Chengpeng Jiao <sup>a</sup>, Zili Huang <sup>a</sup>, Xiaofeng Wang <sup>a</sup>, Haijun Zhang <sup>b\*</sup>, Lilin Lu <sup>c</sup>, Shaowei Zhang <sup>b</sup>

8

9 <sup>a</sup> Hubei Key Laboratory for Efficient Utilization and Agglomeration of Metallurgical Mineral

10 Resources, Wuhan University of Science and Technology, Wuhan 430081, China

11 <sup>b</sup> The State Key Laboratory of Refractories and Metallurgy, Wuhan University of Science and

12 Technology, Wuhan 430081, China

13 <sup>c</sup> College of Chemical Engineering and Technology, Wuhan University of Science and Technology,

14 Wuhan 430081, China

15

16 \*Corresponding author;

17 E-mail of the corresponding author:

18 Prof. Haijun Zhang: zhanghaijun@wust.edu.cn;

## List of contents

- 1
- 2
- 3 Table S1 Comparison of diffraction peaks of Ni<sub>45</sub>Au<sub>45</sub>Co<sub>10</sub> TNPs with the JCPDS data ([M<sup>n+</sup>]= 0.66
- 4 mM, R<sub>NaBH<sub>4</sub></sub>=5, R<sub>PVP</sub>=100).
- 5 Table S2 comparison of catalytic activity of NPs with different composition ([M<sup>n+</sup>]= 0.66 mM,
- 6 R<sub>NaBH<sub>4</sub></sub>=5, R<sub>PVP</sub>=100).
- 7 Fig. S1 Comparison of XRD patterns of Ni<sub>45</sub>Au<sub>45</sub>Co<sub>10</sub> TNPs with Ni, Co and Au (Au, JCPDS: 89-
- 8 3697; Co, JCPDS: 15-0806; Ni, JCPDS: 88-2326; [M<sup>n+</sup>]= 0.66 mM, R<sub>NaBH<sub>4</sub></sub>=5, R<sub>PVP</sub>=100).
- 9 Fig. S2 Catalytic activities of first run and repeated batches (2-7) during the long-time activity test
- 10 of Ni<sub>45</sub>Au<sub>45</sub>Co<sub>10</sub> TNPs ([M<sup>n+</sup>]= 0.66 mM, R<sub>NaBH<sub>4</sub></sub>=5, R<sub>PVP</sub>=100).
- 11 Fig. S3 Hydrogen volume of first run and repeated batches (2-7) during the long-time activity test
- 12 of Ni<sub>45</sub>Au<sub>45</sub>Co<sub>10</sub> TNPs ([M<sup>n+</sup>]= 0.66 mM, R<sub>NaBH<sub>4</sub></sub>=5, R<sub>PVP</sub>=100).
- 13 Fig. S4 TEM micrographs of Ni<sub>45</sub>Au<sub>45</sub>Co<sub>10</sub> TNPs before and after seven catalytic runs ([M<sup>n+</sup>]= 0.66
- 14 mM, R<sub>NaBH<sub>4</sub></sub>=5, R<sub>PVP</sub>=100).
- 15 Fig. S5 Linear fit of LnK to 1/T of Ni<sub>50</sub>Au<sub>10</sub>Co<sub>40</sub> catalyst for hydrogen generation from NaBH<sub>4</sub>.
- 16 Fig. S6 XPS core level spectra of Au, Co and Ni recorded from Ni<sub>50</sub>Au<sub>10</sub>Co<sub>40</sub> TNPs ([M<sup>n+</sup>]= 0.66
- 17 mM, R<sub>NaBH<sub>4</sub></sub>=5, R<sub>PVP</sub>=100).

1  
2

Table S1

| Faces | Au/degree | Co/degree | Ni/degree | Peak of Ni <sub>45</sub> Au <sub>45</sub> Co <sub>10</sub> TNPs |
|-------|-----------|-----------|-----------|-----------------------------------------------------------------|
| 111   | 38.179    | 44.20     | 45.50     | 38.179< <b>38.42</b> <44.20 (45.50)                             |
| 200   | 44.375    | 51.52     | 53.05     | 44.375< <b>44.68</b> < 51.52 (53.05)                            |

3  
4  
5

Table S2

| NPs with varied composition |                                                    | UV-Vis peak /nm | Catalytic activity /mol-H <sub>2</sub> /(h·mol-M) |
|-----------------------------|----------------------------------------------------|-----------------|---------------------------------------------------|
| MNPs                        | Au                                                 | 520             | 150                                               |
|                             | Ni                                                 | -               | 110                                               |
|                             | Co                                                 | -               | 80                                                |
| BNPs                        | Ni <sub>50</sub> Au <sub>50</sub>                  | 492             | 800                                               |
|                             | Co <sub>50</sub> Au <sub>50</sub>                  | 492             | 380                                               |
|                             | Ni <sub>50</sub> Co <sub>50</sub>                  | -               | 80                                                |
| TNPs                        | Ni <sub>50</sub> Au <sub>10</sub> Co <sub>40</sub> | 506             | 790                                               |
|                             | Ni <sub>50</sub> Au <sub>30</sub> Co <sub>20</sub> | 508             | 760                                               |
|                             | Ni <sub>30</sub> Au <sub>30</sub> Co <sub>40</sub> | 492             | 530                                               |
|                             | Ni <sub>35</sub> Au <sub>35</sub> Co <sub>30</sub> | 500             | 500                                               |
|                             | Ni <sub>40</sub> Au <sub>40</sub> Co <sub>20</sub> | 501             | 1030                                              |
|                             | Ni <sub>45</sub> Au <sub>45</sub> Co <sub>10</sub> | 509             | 1170                                              |

6

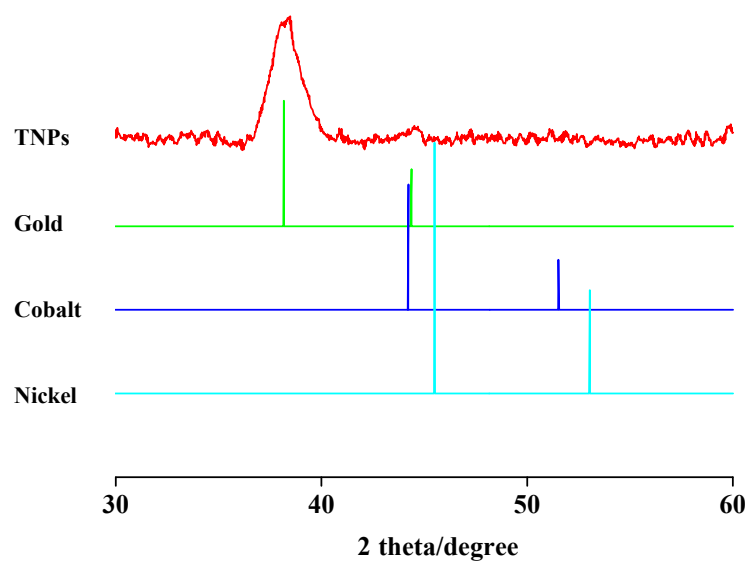

1  
2  
3

Fig. S1

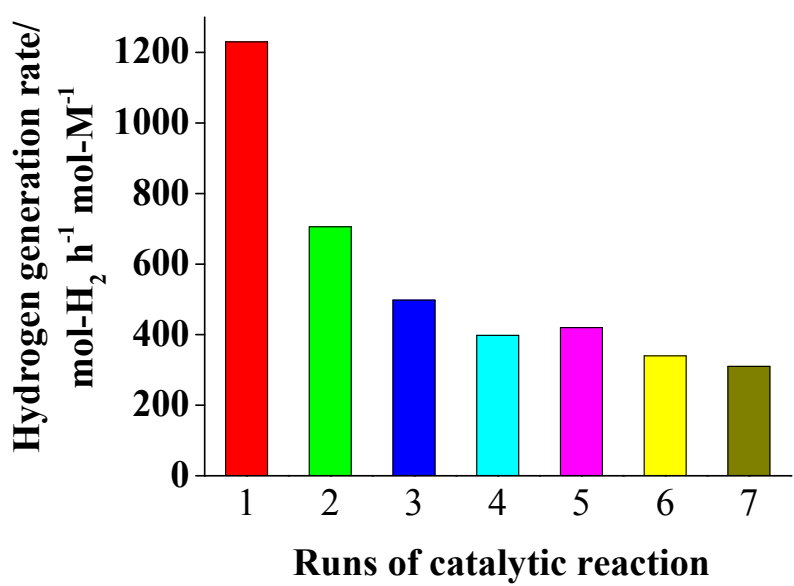

4  
5

Fig. S2

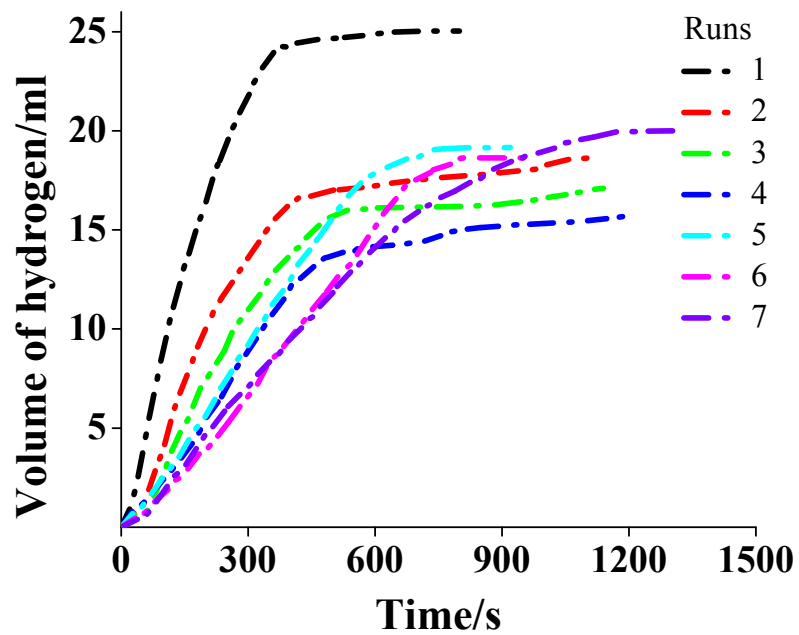

Fig. S3

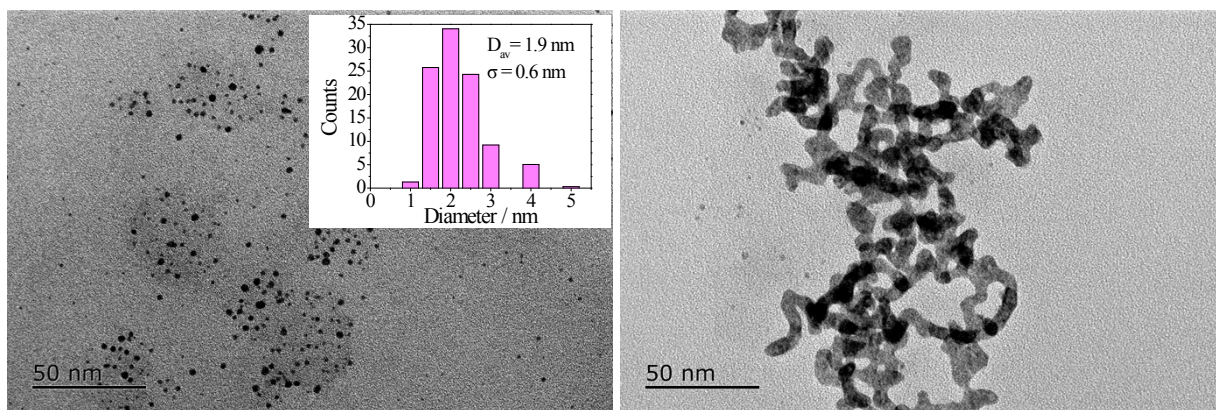

Fig. S4

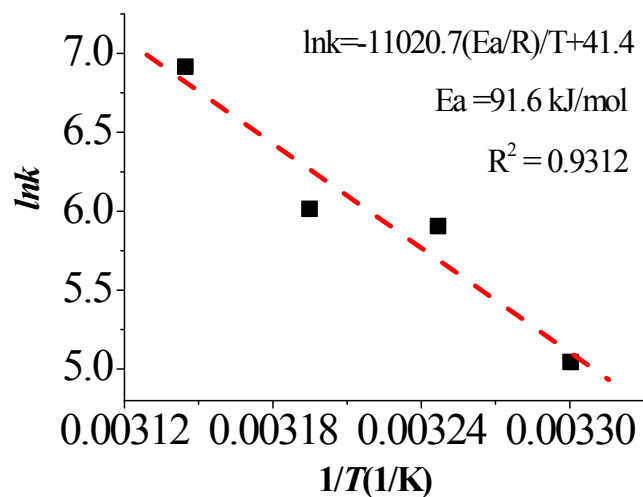

Fig. S5

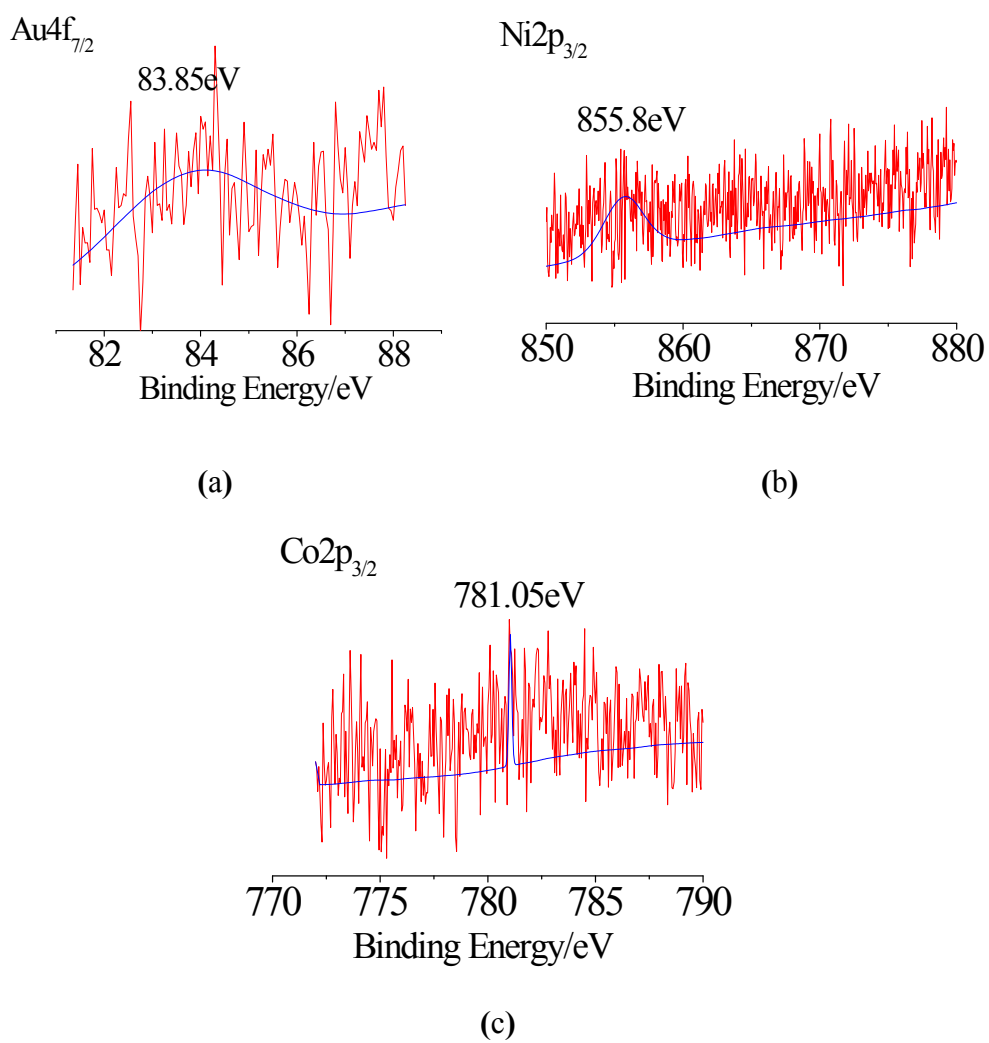

Fig. S6
